# Supplementary material
Source: MDPI journal article supplement (https://www.mdpi.com/2673-6918/4/1/6)
Supplement: s1 [file s1]

# Effect of Particle Size on the Physical Properties of PLA/Potato Peel Composites

Katharina Miller <sup>1,2</sup>, Corina L. Reichert <sup>1</sup>, Myriam Loeffler <sup>2</sup> and Markus Schmid <sup>1,\*</sup>

<sup>1</sup> Sustainable Packaging Institute SPI, Faculty of Life Sciences, Albstadt-Sigmaringen University, 72488 Sigmaringen, Germany

<sup>2</sup> Meat Technology & Science of Protein-Rich Foods (MTSP), Department of Microbial and Molecular Systems, Leuven Food Science and Nutrition Research Centre, KU Leuven Campus Ghent, B-9000 Ghent, Belgium

\* Correspondence: schmid@hs-albsig.de; Tel.: +49-(0)-7571-732-8402

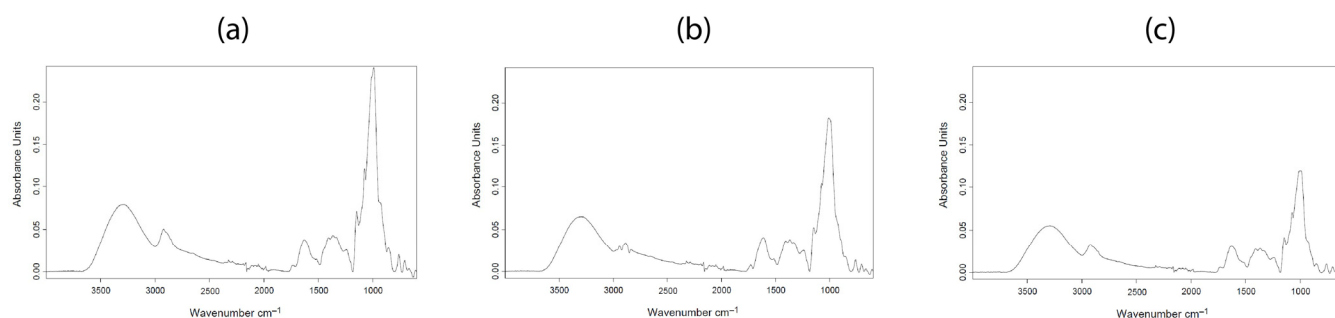

**Figure S1.** Averaged ATR-FTIR spectra of different potato peel particle sizes: (a) 0–53  $\mu\text{m}$ , (b) 125–250  $\mu\text{m}$ , and (c) 315–500  $\mu\text{m}$ .

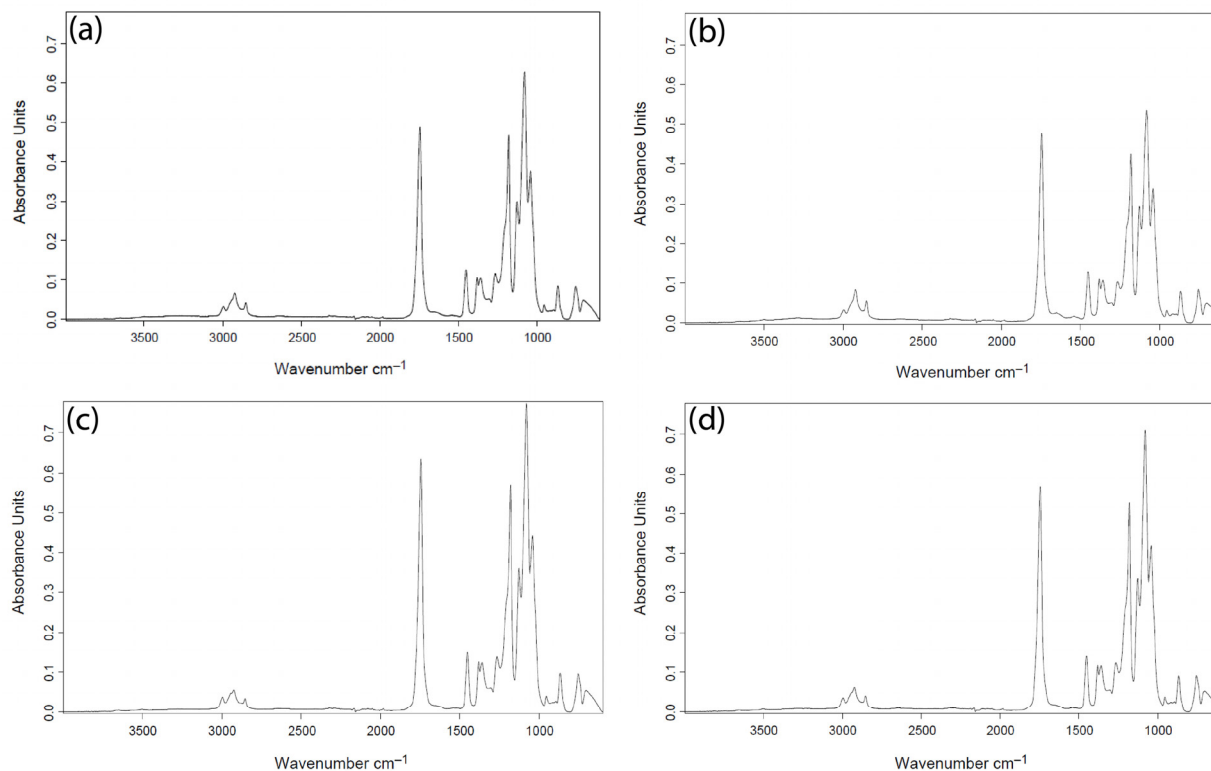

**Figure S2.** Averaged ATR-FTIR spectra of the surface of neat PLA specimens and PLA-Peel biocomposite specimens containing different potato peel particle sizes. (a) neat PLA, (b) PLA-Peel biocomposite (0–53  $\mu\text{m}$ ), (c) PLA-Peel biocomposite (125–250  $\mu\text{m}$ ), and (d) PLA-Peel biocomposite (315–500  $\mu\text{m}$ ).

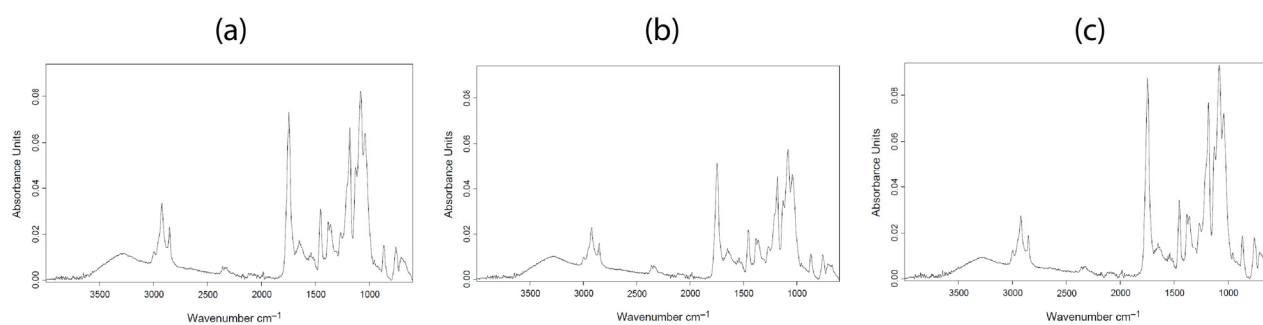

**Figure S3.** Averaged ATR-FTIR spectra of cross-sectional area of PLA-Peel biocomposite specimens containing different potato peel particle sizes: **(a)** 0–53  $\mu\text{m}$ , **(b)** 125–250  $\mu\text{m}$ , and **(c)** 315–500  $\mu\text{m}$ .
